# Supplementary material for: Photonic-chip assisted correlative light and electron microscopy
Source: Springer Nature journal article supplement (doi:10.1038/s42003-020-01473-4), 2020-12-07
Supplement: MOESM2 [file 42003_2020_1473_MOESM2_ESM.pdf]

## Description of Additional Supplementary Files

Title: Supplementary Video 1.

Description: High-Resolution FIB-SEM 3D-reconstruction of fenestrations and endolysosomal compartment in one LSEC (Related to Figure 3)
